# Supplementary material
Source: publisher site journal article supplement (https://www.dovepress.com/article/394220)
Supplement: Supplementary file 1 [file get_supplementary_file.php]

**Supplemental tables**

Supplemental Table 1. Willingness to make treatment decisions for patients with schizophrenia based solely on telepsychiatry visits (N=21)

| **Impact** | **n (%)**† |
| --- | --- |
| Switching from an OAP to an LAI with the same molecule | 15 (71.4) |
| Switching from an LAI to an OAP with the same molecule | 14 (66.7) |
| Switching from an OAP to a different OAP | 14 (66.7) |
| Prescribing a new LAI to a new patient | 13 (61.9) |
| Prescribing a new OAP to a new patient | 13 (61.9) |
| Switching from an LAI to an OAP with a different molecule | 12 (57.1) |
| Switching from an OAP to an LAI with a different molecule | 12 (57.1) |
| Adding an additional antipsychotic medication to a patient’s treatment regimen | 12 (57.1) |
| For patients on multiple antipsychotic medications, removing an antipsychotic medication | 12 (57.1) |
| Switching from an LAI to a different LAI | 10 (47.6) |
| Switching from a shorter to a longer injection interval LAI | 10 (47.6) |
| Switching from a longer to a shorter injection interval LAI | 7 (33.3) |

†More than one response option could be chosen

Abbreviations: LAI, long-acting injectable antipsychotic medication; OAP, oral antipsychotic

Supplemental Table 2. Factors considered when making treatment decisions for patients with schizophrenia based solely on telepsychiatry visits (N=21)

| **Impact** | **n (%)**† |
| --- | --- |
| Medication side effects experienced by the patient | 16 (76.2) |
| The severity of the patient’s symptoms | 15 (71.4) |
| Duration of current treatment regimen | 15 (71.4) |
| Medication efficacy experienced by the patient | 15 (71.4) |
| Change in the severity of the patient’s symptoms | 14 (66.7) |
| The patient’s medical history | 12 (57.1) |
| Whether the patient was new | 10 (47.6) |
| How long the patient had been treated at your practice/clinic | 10 (47.6) |
| The patient was not able/willing to attend an in-person visit | 10 (47.6) |
| The patient’s living situation (eg, if the patient was homeless) | 9 (42.9) |
| Changes in insurance coverage impacting cost of antipsychotic medications | 7 (33.3) |
| Changes in insurance approval making it difficult to switch medications | 6 (28.6) |

†More than one response option could be chosen

Supplemental Survey 1: Impact of COVID-19 Pandemic on Outpatient LAI Management and Use of Telepsychiatry for Patients with Schizophrenia (OASIS-MAPS)

Administered October-November 2020

Table of Contents

[Instructions/Introduction 1](#_Toc51244250)

[Screener 2](#_Toc51244251)

[Survey 3](#_Toc51244252)

[1 Responder Characteristics 3](#_Toc51244253)

[2 Impact of the COVID-19 Pandemic 4](#_Toc51244254)

[3 Telepsychiatry Services and Current Workflow 8](#_Toc51244255)

[4 Barriers Preventing Telepsychiatry Implementation 14](#_Toc51244256)

[5 Future Telepsychiatry Considerations 16](#_Toc51244257)

[6 Global Impressions of Using Telepsychiatry for Managing LAI Treatment 18](#_Toc51244258)

[7 Barriers Preventing Telepsychiatry Implementation and Future Considerations 19](#_Toc51244259)

Instructions/Introduction


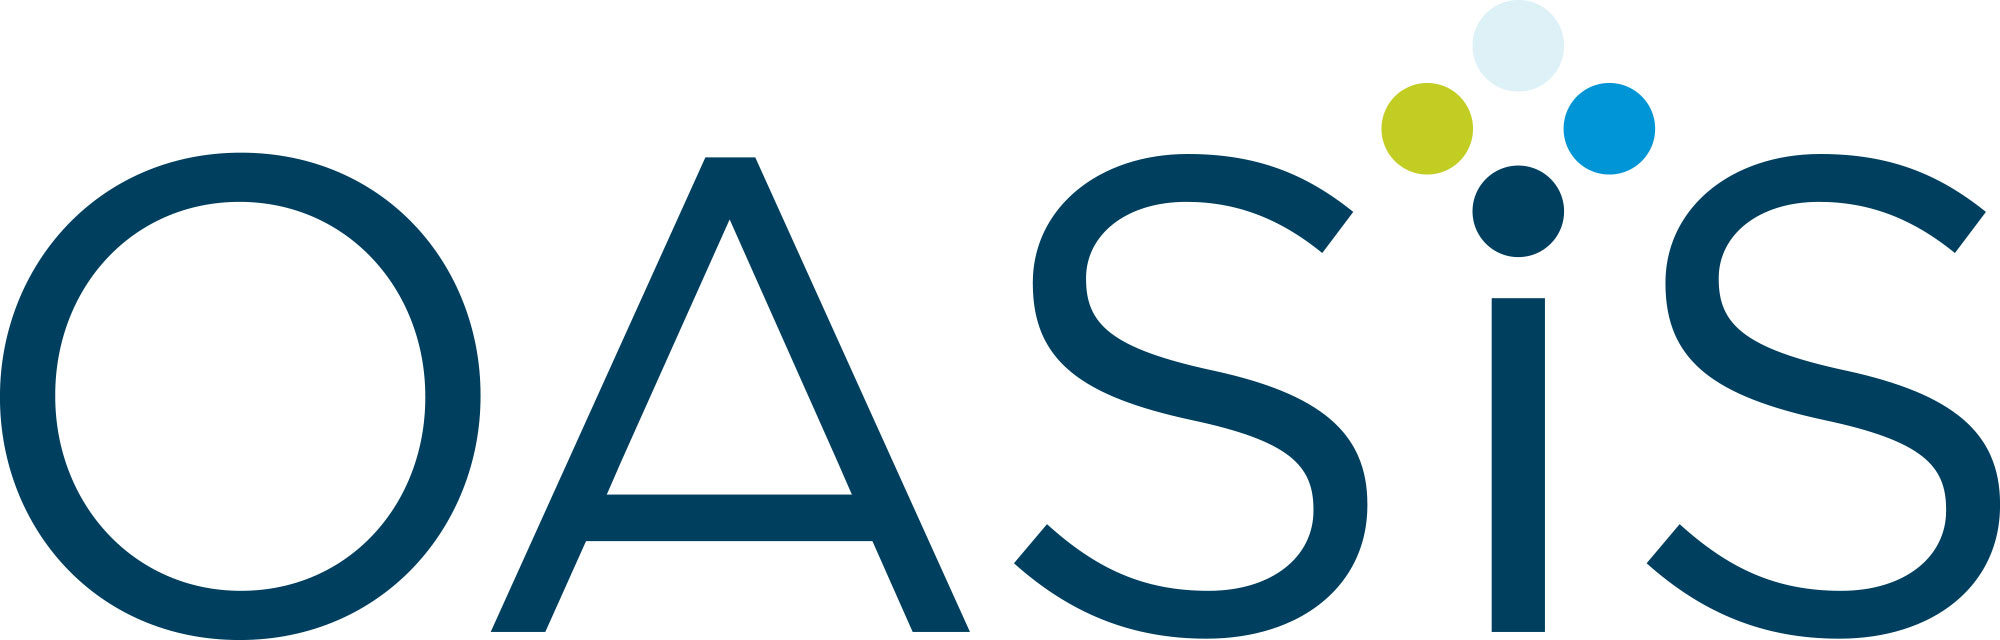


The following survey has been created to collect insights into treatment management during the COVID-19 pandemic. Clinical sites enrolling patients with schizophrenia treated with atypical long-acting injectable antipsychotics (LAI) participating in the Alkermes OASIS Study (ALKS 9072-A403N) will be included. The focus of the survey is to better understand how your practice/clinic manages all patients with schizophrenia, including patients prescribed LAIs, and is not limited to patients enrolled in the OASIS Study.

Specifically, Alkermes is interested in learning about the impact the COVID-19 pandemic has had on managing patients with schizophrenia, including patients prescribed LAIs, and the emergence of telepsychiatry.

No identifiable information about any individual participating in this study will be reported or made publically available. Aggregate survey results may be published or presented to disseminate findings. Open-ended item responses, which may be presented individually, will be quoted anonymously.

Participation is voluntary and will not affect your participation in the OASIS Study. The survey is expected to take 20-25 minutes. OASIS sites that complete the entire survey will be compensated with a one-time payment in the amount of $50 USD.

If you cannot finish the survey in one sitting, the ‘Save and Continue Later’ option allows you to create an individual account to finish your survey at a later time. Using this option will require you to provide your email address so that you can be sent an individualized link back to your survey. Reminders may also be sent to your email to complete the survey.

I agree to the terms of participation in this survey

[CONTINUE BUTTON]

[Programming note: Provide ‘Continue’ button before proceeding to survey content]

Screener

Please confirm whether you agree or disagree with the following statements:

| **Item Number** | **Question Text** | **Response Option 1** | **Response Option 2** |
| --- | --- | --- | --- |
| Screener1 | Please enter the last four digits of your 7-digit Site ID from the OASIS Study, which was provided in your email invitation to this survey. | 8 4 0 _ _ _ _  [Programming note: numeric entry] |  |
| Screener2 | I have been working at my current practice/clinic for at least a year. | - Agree | - Do not agree |
| Screener3 | I am an OASIS site principal investigator (PI), or I am a prescribing clinician at my current practice/clinic who was appointed by the OASIS PI to complete this survey. | - Agree | - Do not agree |
| Screener4 | I have knowledge about the following:   1. Standard of care prescribing practices for patients with schizophrenia at my practice/clinic 2. Standard of care prescribing practices for long-acting injectable antipsychotics (LAIs) at my practice/clinic 3. General site operations before and during the COVID-19 pandemic, including visit scheduling, day-to-day operations, changes to physical office set-up, and telepsychiatry | - Agree | - Do not agree |
| Screener5 | I acknowledge that my participation in this survey is completely voluntary and that my responses will be used for research purposes. | - Agree | - Do not agree |

[Programming Note: If ‘Do not agree’ for any item, do not proceed to survey. Provide the following text information if the participant is not eligible: “Thank you for your interest; however, you do not meet the criteria for the current study.”]

Survey

[Programming note: All items are required unless otherwise noted with skip logic]

# Responder Characteristics

[Programming Note: This section is administered to all participants]

**Resp1:** How many years have you been practicing in the field of psychiatry/behavioral health?

_ _ [Programming note: 2-digit numeric entries]

**Resp2:** If you are a prescribing clinician, how many years have you been prescribing LAIs?

_ _ [Programming note: 2-digit numeric entries]

**Resp3:** How many years have you been working at your current practice/clinic?

_ _ [Programming note: 2-digit numeric entries]

**Resp4:** What is your current age (in years)?

_ _ [Programming note: 2-digit numeric entries]

| **Resp5:** What is your identified gender? | |
| --- | --- |
| Male |  |
| Female |  |
| Other |  |
| Prefer not to answer |  |

# Impact of the COVID-19 Pandemic

[Programming note: This section is administered to all participants]

| **Impact1:** How has the COVID-19 pandemic impacted your practice/clinic?  *Select all that apply* | |
| --- | --- |
| Temporarily closed for all services due to a government mandate |  |
| Temporarily closed, except for essential visits, due to a government mandate |  |
| Temporarily closed, fully or partially, for reasons other than a government mandate |  |
| Limited operations (including reducing in-person office visits) due to internal staffing shortages |  |
| Limited operations (including reducing in-person office visits) due to internal administrative decisions (for reasons other than staffing shortages) |  |
| Limited operations (including reducing in-person office visits) due to decreased patient volume |  |
| Voluntarily decreased scheduling of in-person office visits to adhere to national or local safety guidelines |  |
| Furloughed staff |  |
| Changed in-person office visit procedures to adhere to national or local safety guidelines (e.g., mandatory temperature checks, social distancing) |  |
| Provided masks, hand sanitizer, and other PPE, and/or took other precautions (e.g., implementing social distancing for staff and patients) for in-person office visits |  |
| Restricted in-person office visits to patients only (i.e., families/caregivers not allowed to attend) |  |
| Established outdoor or drive-thru clinics for treatment administration or other patient care |  |
| Started or increased number of in-home visits for treatment administration or other patient care |  |
| Started or increased the use of text messages, emails, and/or telepsychiatry for medication reminders |  |
| Other (please specify): _______________ [Programming note: short text box] |  |

| **Impact2:** Has your practice/clinic implemented any of the following strategies since the start of the COVID-19 pandemic to maintain continuity of care for patients with schizophrenia treated with LAIs?  *Select all that apply* | |
| --- | --- |
| Started and/or increased number of referrals to local pharmacies, “minute clinics,” or other outpatient providers for administration of LAIs |  |
| Set up outdoor or drive-thru clinics for administration of LAIs |  |
| Started and/or increased number of in-home visits for administration of LAIs |  |
| Implemented or expanded telepsychiatry (i.e., visits by phone or video) services |  |
| Implemented procedures to assist patients who are unable to wear masks during in-person or in-home LAI administrations |  |
| Other (please specify): _______________ [Programming note: short text box] |  |

| **Impact3:** Since the start of the COVID-19 pandemic, what changes in clinicians’ prescribing patterns have occurred at your practice/clinic for patients with schizophrenia treated with LAIs?  *Select all that apply per row, or ‘Does not apply’* | | | |
| --- | --- | --- | --- |
|  | Driven by clinician recommendation | Driven by patient request | Does not apply |
| Switching from LAIs to oral antipsychotics |  |  |  |
| Switching to longer-lasting LAIs (e.g., Aristada® 1064mg, Invega Trinza®) to increase time intervals between injections |  |  |  |
| Other (please specify): _______________ [Programming note: short text box] |  |  |  |

| **Impact4:** Since the start of the COVID-19 pandemic, has there been a change in medication adherence for patients at your practice/clinic? | | | | |
| --- | --- | --- | --- | --- |
|  | Medication adherence has increased | Medication adherence has decreased | No change | I don’t know |
| All patients with schizophrenia |  |  |  |  |
| Patients with schizophrenia treated with LAIs |  |  |  |  |
| Patients with schizophrenia treated with oral antipsychotics |  |  |  |  |

[Programming note: If ‘Medication adherence has increased’ OR ‘Medication adherence has decreased’ AND ‘Patients with schizophrenia treated with LAIs’, then ask Impact5 – Impact7]

| [Programming note: If ‘Medication adherence has increased’ OR ‘Medication adherence has decreased’ AND ‘Patients with schizophrenia treated with LAIs’ to Impact4]  **Impact5:** Since the start of the COVID-19 pandemic, how has medication adherence been impacted for patients with schizophrenia treated with LAIs at your practice/clinic?  *Select all that apply* | |
| --- | --- |
| Increased intervals between injections due to rescheduled visits |  |
| Increased number of patient “no shows” for scheduled visits |  |
| Decreased number of patient “no shows” for scheduled visits |  |
| Other (please specify): ___________________ [Programming note: short text box] |  |
| I don’t know |  |

| [Programming note: If ‘Medication adherence has increased’ OR ‘Medication adherence has decreased’ AND ‘Patients with schizophrenia treated with LAIs’ to Impact4]  **Impact6:** Since the start of the COVID-19 pandemic, what are the reasons that medication adherence, due to frequency of patients missing or delaying injection visits, has been impacted among patients with schizophrenia treated with LAIs at your practice/clinic?  *Select all that apply* | |
| --- | --- |
| Patients missing or delaying injection visits more often due to clinic closure or reduction of clinic hours |  |
| Patients missing or delaying injection visits more often due to lack of transportation |  |
| Patients missing or delaying injection visits more often due to financial problems (e.g., no longer have health insurance due to losing job) |  |
| Patients missing or delaying injection visits more often due to not wanting to leave their homes (e.g., due to fear of contracting the COVID-19 virus) |  |
| Increased difficulty contacting patients to schedule injection visits |  |
| Patients missing or delaying injection visits less often due to increased availability |  |
| Other (please specify): ___________________ [Programming note: short text box] |  |
| I don’t know |  |

| [Programming note: If ‘Medication adherence has increased’ OR ‘Medication adherence has decreased’ AND ‘Patients with schizophrenia treated with LAIs’ to Impact4]  **Impact7:** Since the start of the COVID-19 pandemic, what actions have been taken to improve medication adherence among patients with schizophrenia treated with LAIs at your practice/clinic?  *Select all that apply* | |
| --- | --- |
| Extended clinic hours |  |
| Established alternate sites for administering LAIs (e.g., outdoor clinic, drive-thru clinic) |  |
| Assisted patients with identifying transportation resources |  |
| Financial assistance (e.g., helped patients access available discounts for cost of medication, provided payment plans to assist with cost of visit) |  |
| Provided patients with PPE to reduce likelihood of contracting the COVID-19 virus when leaving their homes |  |
| Educated patients on ways to reduce likelihood of contracting the COVID-19 virus when leaving their homes |  |
| Switched patients to LAIs with longer injection intervals (e.g., Aristada® 1064mg, Invega Trinza®) |  |
| Switched patients to oral antipsychotics |  |
| Other (please specify): ___________________ [Programming note: short text box] |  |
| None of the above |  |

**Impact8:** Since the start of the COVID-19 pandemic, please describe any other ways that medication adherence has been impacted at your practice/clinic among patients with schizophrenia.

[Programming note: extended text box]

| **Impact9:** Since the start of the COVID-19 pandemic,have patients with schizophrenia treated with LAIsat your practice/clinic experienced a change in any of the following? | | | | |
| --- | --- | --- | --- | --- |
|  | Yes, better since COVID-19 | Yes, worse since COVID-19 | No | I don’t know / Not applicable |
| Wait time for an in-person visit |  |  |  |  |
| Wait time for a telepsychiatry visit |  |  |  |  |
| Ease of scheduling an in-person visit |  |  |  |  |
| Ease of scheduling a telepsychiatry visit |  |  |  |  |
| Patient awareness of telepsychiatry services |  |  |  |  |

| **Impact10:** Since the start of the COVID-19 pandemic, has communication with patients with schizophrenia treated with LAIs about their treatment become easier or more difficult? | |
| --- | --- |
| Much easier |  |
| Somewhat easier |  |
| No change |  |
| Somewhat more difficult |  |
| Much more difficult |  |

| **Impact11:** Since the start of the COVID-19 pandemic, has the ability to determine treatment effectiveness among patients with schizophrenia treated with LAIs become easier or more difficult? | |
| --- | --- |
| Much easier |  |
| Somewhat easier |  |
| No change |  |
| Somewhat more difficult |  |
| Much more difficult |  |

# Telepsychiatry Services and Current Workflow

[Programming note: Workflow1 is administered to all participants. The remainder of this section is administered based on the branching instructions in Workflow1]

| **Workflow1:** Does your practice/clinic currently utilize telepsychiatry services for outpatient visits?  *Please choose one* | |
| --- | --- |
| Yes, telepsychiatry services were utilized before the start of the COVID-19 pandemic, and we have not expanded them during the COVID-19 pandemic |  |
| Yes, telepsychiatry services were utilized before the start of the COVID-19 pandemic, and we have expanded them during the COVID-19 pandemic |  |
| Yes, we started utilizing telepsychiatry services during the COVID-19 pandemic (that is, they were not utilized before the start of the COVID-19 pandemic) |  |
| No |  |

[Programming note: If any ‘Yes’ response, administer remainder of Section 3 through Section 6, but NOT Section 7; if ‘No’ skip remainder of Section 3 through Section 6 and administer Section 7 ONLY]

| **Workflow2:** Please indicate which types of patients you are more likely to encourage utilizing telepsychiatry services at your practice/clinic.  *Select all that apply* | |
| --- | --- |
| New patients |  |
| Patients with more severe symptoms |  |
| Patients with less severe symptoms |  |
| Patients living farther from the clinic |  |
| Patients living in a rural setting |  |
| Patients initiating new therapies |  |
| Patients who specifically request telepsychiatry services |  |
| Patients with transportation issues |  |
| Patients with comorbid medical conditions |  |
| Other (please specify): ___________________ [Programming note: short text box] |  |

| **Workflow3:** Since the start of the COVID-19 pandemic, how has the frequency of telepsychiatry visits at your practice/clinic changed?  *Select one response per row* | | | | |
| --- | --- | --- | --- | --- |
|  | Telepsychiatry visits occur more frequently | Frequency of telepsychiatry visits has not changed | Telepsychiatry visits occur less frequently | Telepsychiatry is not used within this patient population |
| All patients with schizophrenia |  |  |  |  |
| Patients with schizophrenia treated with LAIs |  |  |  |  |
| Patients with schizophrenia treated with oral antipsychotics |  |  |  |  |

| **Workflow4:** How has the use of telemedicine modalities changed at your practice/clinic?  *Select one response per row* | | | | | |
| --- | --- | --- | --- | --- | --- |
|  | Never used and have not started | Started using during the COVID-19 pandemic | Used before the COVID-19 pandemic and continue to use at the same or decreased frequency | Used before the COVID-19 pandemic and continue to use, but with an increased frequency | Stopped using since the start of the COVID-19 pandemic |
| Patient portal |  |  |  |  |  |
| Telemedicine-specific software (e.g., Mend, SynziMD, etc.) |  |  |  |  |  |
| Online with video capability (e.g., Zoom, Webex, etc.) |  |  |  |  |  |
| Online without video capability (e.g., Zoom, Webex, etc.) |  |  |  |  |  |
| Phone with video (e.g., FaceTime, What’sApp, etc.) |  |  |  |  |  |
| Phone (voice only) |  |  |  |  |  |
| Text messages |  |  |  |  |  |
| Emails |  |  |  |  |  |

| **Workflow5:** Since the start of the COVID-19 pandemic, has your practice/clinic purchased new technology and/or equipment in order to utilize telepsychiatry?  *Select all that apply* | |
| --- | --- |
| EMR or patient portal add-on for telepsychiatry |  |
| Subscription to online video conferencing |  |
| Video compatible phones/tablets for use at the practice/clinic |  |
| Video compatible phones/tablets for patients to use from home |  |
| Other (please specify): ____________________ [Programming note: short text box] |  |
| No additional technology and/or equipment has been purchased |  |

| **Workflow6:** Since the start of the COVID-19 pandemic, has your practice/clinic adopted any new telepsychiatry services for treating patients with schizophrenia treated with LAIs? If so, please indicate whether the change was influenced by patient preference.  *Select one response per row* | | | |
| --- | --- | --- | --- |
|  | Adopted; was influenced by patient preference | Adopted; was not influenced by patient preference | Not Adopted |
| Audio communication |  |  |  |
| Video communication |  |  |  |
| Email communication |  |  |  |
| Text communication |  |  |  |
| Other (please specify): ___________________ [Programming note: short text box] |  |  |  |

| **Workflow7:** For each of the following periods, approximately what percentage of outpatient visits was facilitated using telepsychiatry at your practice/clinic? | | |
| --- | --- | --- |
|  | Visits before the COVID-19 pandemic | Visits during the COVID-19 pandemic |
| New patient visits | ___% | ___% |
| Treatment initiation visits | ___% | ___% |
| Routine visits | ___% | ___% |
| Monitoring visits (*not* for injection) | ___% | ___% |
| Crisis visits | ___% | ___% |

[Programming note: Numeric drop-downs with options for 0%, 10%, 20%, 30%, 40%, 50%, 60%, 70%, 80%, 90%, 100%]

| **Workflow8:** Since the start of the COVID-19 pandemic, has there been a change in the rate of “no show” visits and/or late cancellations for in-person office visits for patients with schizophrenia treated with LAIs at your practice/clinic? | | | |
| --- | --- | --- | --- |
|  | Yes, more now | Yes, fewer now | No change |
| New patient visits |  |  |  |
| Treatment initiation visits |  |  |  |
| Routine visits |  |  |  |
| Monitoring visits (*not* for injection) |  |  |  |
| Injection visits (LAI patients only) |  |  |  |
| Crisis visits |  |  |  |

| **Workflow9:** Since the start of the COVID-19 pandemic, has there been a change in the rate of “no show” visits and/or late cancellations for telepsychiatry visitsfor patients with schizophrenia treated with LAIs at your practice/clinic? | | | |
| --- | --- | --- | --- |
|  | Yes, more now | Yes, fewer now | No change |
| New patient visits |  |  |  |
| Treatment initiation visits |  |  |  |
| Routine visits |  |  |  |
| Monitoring visits |  |  |  |
| Crisis visits |  |  |  |

| **Workflow10:** Indicate your level of agreement with the following statements when considering the utilization of telepsychiatry services at your practice/clinic for patients with schizophrenia treated with LAIs: | | | | | | |
| --- | --- | --- | --- | --- | --- | --- |
|  | Strongly agree | Slightly agree | Neither agree nor disagree | Slightly disagree | Strongly disagree | Not applicable |
| I am able to establish therapeutic relationships with patients |  |  |  |  |  |  |
| I am willing to prescribe new antipsychotic medications |  |  |  |  |  |  |
| Patients are willing to start new antipsychotic medications |  |  |  |  |  |  |
| I am able to assess the effectiveness of LAI medications |  |  |  |  |  |  |
| I am able to detect the presence of side effects of LAI medications |  |  |  |  |  |  |
| I am able to assess the frequency of side effects of LAI medications |  |  |  |  |  |  |
| I am able to assess the severity of side effects of LAI medications |  |  |  |  |  |  |
| I am able to help patients manage side effects of LAI medications |  |  |  |  |  |  |
| I am able to monitor the course of a patient’s illness |  |  |  |  |  |  |

# Barriers Preventing Telepsychiatry Implementation

[Programming note: This section is only administered to participants who responded ‘Yes’ to Workflow1]

| **Barrier1:** Please indicate which of the following barriers or challenges your practice/clinic has encountered, with respect to implementing telepsychiatry services. | | | | |
| --- | --- | --- | --- | --- |
|  | Not a barrier/ challenge | Slightly limiting barrier/ challenge | Moderately limiting barrier/ challenge | Extremely limiting barrier/ challenge |
| EMR does not have telemedicine functionality (e.g., telemedicine plug-in). If your practice/clinic does not use EMR, select “Not a barrier/challenge”. |  |  |  |  |
| Lack of access to necessary technology and/or equipment |  |  |  |  |
| Lack of IT support for setup and maintenance |  |  |  |  |
| Funding/cost of implementation |  |  |  |  |
| Reimbursement rate is lower for telepsychiatry visits than for office visits |  |  |  |  |
| Insufficient clinician staffing to support telepsychiatry |  |  |  |  |
| Insufficient resources to train staff on use of telepsychiatry services |  |  |  |  |
| Willingness of clinicians to adopt or utilize telepsychiatry |  |  |  |  |
| Privacy/security concerns |  |  |  |  |
| Other (please specify): ________ [Programming note: short text box] |  |  |  |  |

| **Barrier2:** If your practice/clinic currently utilizes telepsychiatry for patients with schizophrenia treated with LAIs, which of the following patient-related barriers or challenges have you encountered?  *Select all that apply* | |
| --- | --- |
| Distrust of technology |  |
| Lack of access to technology (e.g., telephone) and/or reliable internet |  |
| Patient training on the use of technology |  |
| Lack of comprehension of visit content or concentration during visit |  |
| Cultural or linguistic barriers that can only be overcome by in-person visits |  |
| Homelessness |  |
| Other (please specify): ________ [Programming note: extended text box] |  |

| **Barrier3:** What adaptations has your practice/clinic employed to help overcome the barriers or challenges of utilizing telepsychiatry services?  S*elect all that apply* | |
| --- | --- |
| Expanded EMR functionality to utilize telemedicine (e.g., purchased plug-in) |  |
| Gained access to telemedicine-compatible technology |  |
| Introduced/expanded IT support for setup and maintenance |  |
| Received funding for implementation (i.e., loans, grants) |  |
| Acquired resources to train staff on technology |  |
| Increased staffing |  |
| Trained patients on technology |  |
| Trained patients on proper telepsychiatry communication |  |
| Worked to improve patients’ comfort with telemedicine modality (e.g., reduced their fears about lack of privacy) |  |
| Provided patients with compatible technology |  |
| Other (please specify): ________ [Programming Note: short text box |  |
| None of the above |  |

# Future Telepsychiatry Considerations

[Programming note: This section is only administered to participants who responded ‘Yes’ to Workflow1]

| **Future1:** To the best of your knowledge, what is the likelihood of your practice/clinic using the following types of visits after the COVID-19 pandemic has ended? | | | | | |
| --- | --- | --- | --- | --- | --- |
|  | Very likely | Somewhat likely | Somewhat unlikely | Very unlikely | I don’t know |
| In-person office visits only |  |  |  |  |  |
| Hybrid (combination of in-person office visits and telepsychiatry visits) |  |  |  |  |  |
| Telepsychiatry visits only |  |  |  |  |  |

| **Future2:** To the best of your knowledge, what is the likelihood of your practice/clinic utilizing telepsychiatry for the following types of patient visits after the COVID-19 pandemic has ended? | | | | | |
| --- | --- | --- | --- | --- | --- |
|  | Very likely | Somewhat likely | Somewhat unlikely | Very unlikely | I don’t know |
| New patient visits |  |  |  |  |  |
| Treatment initiation visits |  |  |  |  |  |
| Routine visits |  |  |  |  |  |
| Monitoring visits |  |  |  |  |  |
| Crisis visits |  |  |  |  |  |

| **Future3:** To the best of your knowledge, what is the likelihood of your practice/clinic continuing the utilization of telepsychiatry to support maintenance and medication adherence for patients with schizophrenia treated with LAIs after the COVID-19 pandemic has ended? | |
| --- | --- |
| Very likely |  |
| Somewhat likely |  |
| Somewhat unlikely |  |
| Very unlikely |  |
| I don’t know |  |

| **Future4:** To the best of your knowledge, does your practice/clinic plan to make any further changes to telepsychiatry services to support patients with schizophrenia treated with LAIs after the COVID-19 pandemic has ended?  *Select all that apply* | |
| --- | --- |
| Yes, to invest further in telemedicine technology |  |
| Yes, to increase frequency of telepsychiatry utilization |  |
| Yes, to invest less in telemedicine technology |  |
| Yes, to decrease frequency of telepsychiatry utilization |  |
| No, there is no current plan to change |  |
| Other (please specify): ________ [Programming note: short text box] |  |
| I don’t know |  |

**Future5:** Please describe your overall impressions regarding the future utilization of telepsychiatry at your practice/clinic beyond the COVID-19 pandemic.

[Programming note: extended text box]

| **Future6:** To the best of your knowledge, what is the likely future role of LAI treatment at your practice/clinic after the COVID-19 pandemic has ended?  *Select all that apply* | |
| --- | --- |
| LAIs will be prescribed more frequently based on interactions with patients during telepsychiatry visits alone (i.e., without the need for in-person office visits) |  |
| LAIs with longer injection intervals will be prescribed more frequently |  |
| LAIs will be prescribed MORE frequently relative to oral antipsychotics |  |
| LAIs will be prescribed LESS frequently relative to oral antipsychotics |  |
| Other (please specify): ________ [Programming note: short open text] |  |
| No change in how LAIs will be prescribed |  |

# Global Impressions of Using Telepsychiatry for Managing LAI Treatment

[Programming note: This section is only administered to participants who responded ‘Yes’ to Workflow1]

The following items aim to capture your perspective of how the COVID-19 pandemic and the utilization of telepsychiatry has impacted the ability to care for patients with schizophrenia.

| **Global1:** Before the start of the COVID-19 pandemic, whatwas your attitude about the potential effectiveness of telepsychiatry services to support patients with schizophrenia treated with LAIs? | |
| --- | --- |
| Optimistic |  |
| Open-minded, but cautious |  |
| Neutral |  |
| Pessimistic |  |

| **Global2:** Since the start of COVID-19 pandemic, how satisfied are you with telepsychiatry services in supporting the following types of patients at your practice/clinic? | | | | | |
| --- | --- | --- | --- | --- | --- |
|  | Extremely satisfied | Very satisfied | Moderately satisfied | Slightly satisfied | Not satisfied at all |
| Patients with schizophrenia |  |  |  |  |  |
| Patients with schizophrenia treated with LAIs |  |  |  |  |  |
| Patients with schizophrenia treated with oral antipsychotics |  |  |  |  |  |

**Global3:** Please describe your overall impressions regarding the impact that the COVID-19 pandemic has had on the ability of your practice/clinic to support patients with schizophrenia treated with LAIs.

[Programming note: extended text box]

# Barriers Preventing Telepsychiatry Implementation and Future Considerations

[Programming note: This section is only administered to participants who responded ‘No’ to Workflow1]

| **NoTM1:** Whatis your attitude about the potential effectiveness of telepsychiatry services to support patients with schizophrenia treated with LAIs at your practice/clinic? | |
| --- | --- |
| Optimistic |  |
| Open-minded, but cautious |  |
| Neutral |  |
| Pessimistic |  |

| **NoTM2:** Does your practice/clinic plan to implement telepsychiatry, including for support of LAI maintenance and medication adherence? | |
| --- | --- |
| Yes, it is currently working to implement telepsychiatry |  |
| Yes, it is planning to implement telepsychiatry in the future |  |
| No plans to implement telepsychiatry at this time |  |

[Programming note: If any ‘Yes’ response, administer NoTM3 – NoTM5]

| [Programming note: If ‘Yes’ to NoTM2]  **NoTM3:** To the best of your knowledge, what is the likelihood your practice/clinic will use the following types of visits after the COVID-19 pandemic has ended? | | | | | |
| --- | --- | --- | --- | --- | --- |
|  | Very likely | Somewhat likely | Somewhat unlikely | Very unlikely | I don’t know |
| In-person office visits only |  |  |  |  |  |
| Hybrid (combination of in-person office visits and telepsychiatry visits) |  |  |  |  |  |
| Telepsychiatry visits only |  |  |  |  |  |

| [Programming note: If ‘Yes’ to NoTM2]  **NoTM4:** To the best of your knowledge, if telepsychiatry is implemented at your practice/clinic, what is the likelihood telepsychiatry will be used for the following types of patient visits? | | | | | |
| --- | --- | --- | --- | --- | --- |
|  | Very likely | Somewhat likely | Somewhat unlikely | Very unlikely | I don’t know |
| New patient visits |  |  |  |  |  |
| Treatment initiation visits |  |  |  |  |  |
| Routine visits |  |  |  |  |  |
| Monitoring visits |  |  |  |  |  |
| Crisis visits |  |  |  |  |  |

| [Programming note: If ‘Yes’ to NoTM2]  **NoTM5:** To the best of your knowledge, if telepsychiatry is implemented at your practice/clinic, what is the likelihood telepsychiatry will be utilized to support maintenance and medication adherence for patients with schizophrenia treated with LAIs? | |
| --- | --- |
| Very likely |  |
| Somewhat likely |  |
| Somewhat unlikely |  |
| Very unlikely |  |
| I don’t know |  |

| **NoTM6:** Please indicate which of the following barriers or challenges your practice/clinic has encountered with respect to implementing telepsychiatry services. | | | | |
| --- | --- | --- | --- | --- |
|  | Not a barrier/ challenge | Slightly limiting barrier/ challenge | Moderately limiting barrier/ challenge | Extremely limiting barrier/ challenge |
| EMR does not have telemedicine functionality (e.g., telemedicine plug-in) If your practice/clinic does not use EMR, select “Not a barrier/challenge”. |  |  |  |  |
| Lack of access to necessary technology and/or equipment |  |  |  |  |
| Lack of IT support for setup and maintenance |  |  |  |  |
| Funding/cost of implementation |  |  |  |  |
| Reimbursement rate is lower for telepsychiatry visits than for office visits |  |  |  |  |
| Insufficient clinician staffing to support telepsychiatry |  |  |  |  |
| Insufficient resources to train staff on use of telepsychiatry services |  |  |  |  |
| Willingness of clinicians to adopt or utilize telepsychiatry |  |  |  |  |
| Privacy/security concerns |  |  |  |  |
| Other (please specify): ________ [Programming Note: short open text] |  |  |  |  |

| **NoTM7:** Please indicate which of the following barriers or challenges related to patients with schizophrenia treated with LAIs at your practice/clinic have hindered or prevented the implementation of telepsychiatry services.  *Select all that apply* | |
| --- | --- |
| Distrust of technology |  |
| Lack of access to technology (e.g., telephone) and/or reliable internet |  |
| Lack of knowledge on the use of telepsychiatry |  |
| Cultural or linguistic barriers that can only be overcome by in-person visits |  |
| Homelessness |  |
| Other (please specify): ________ [Programming Note: extended text box] |  |

| **NoTM8:** To the best of your knowledge, what is the likely future role of LAI treatment at your practice/clinic after the COVID-19 pandemic has ended?  *Select all that apply* | |
| --- | --- |
| LAIs with longer injection intervals will be prescribed more frequently |  |
| LAIs will be prescribed MORE frequently relative to oral antipsychotics |  |
| LAIs will be prescribed LESS frequently relative to oral antipsychotics |  |
| Other (please specify): ________ [Programming note: short text box] |  |
| No change in how LAIs will be prescribed |  |

**NoTM9:** Please describe your overall impressions regarding the impact that the COVID-19 pandemic has had on the ability of your practice/clinic to support patients with schizophrenia treated with LAIs.

[Programming note: extended text box]

Supplemental Survey 2: Impact of COVID-19 Pandemic on Outpatient LAI Management and Use of Telepsychiatry for Patients with Schizophrenia (OASIS-MAPS)

Administered July-September 2021

Table of Contents

[1 Responder Characteristics 4](#_Toc76976728)

[2 Changes in Prescribing Patterns during the COVID-19 Pandemic 5](#_Toc76976729)

[2.1 Switching from LAIs to Oral Antipsychotics 5](#_Toc76976730)

[2.2 Switching to Longer Injection Interval LAIs 6](#_Toc76976731)

[3 Willingness to Make Treatment Decisions during Telepsychiatry Visits 8](#_Toc76976732)

[4 Impact of Reimbursement Rates on Use of Telepsychiatry Visits 10](#_Toc76976733)

**Instructions/Introduction**


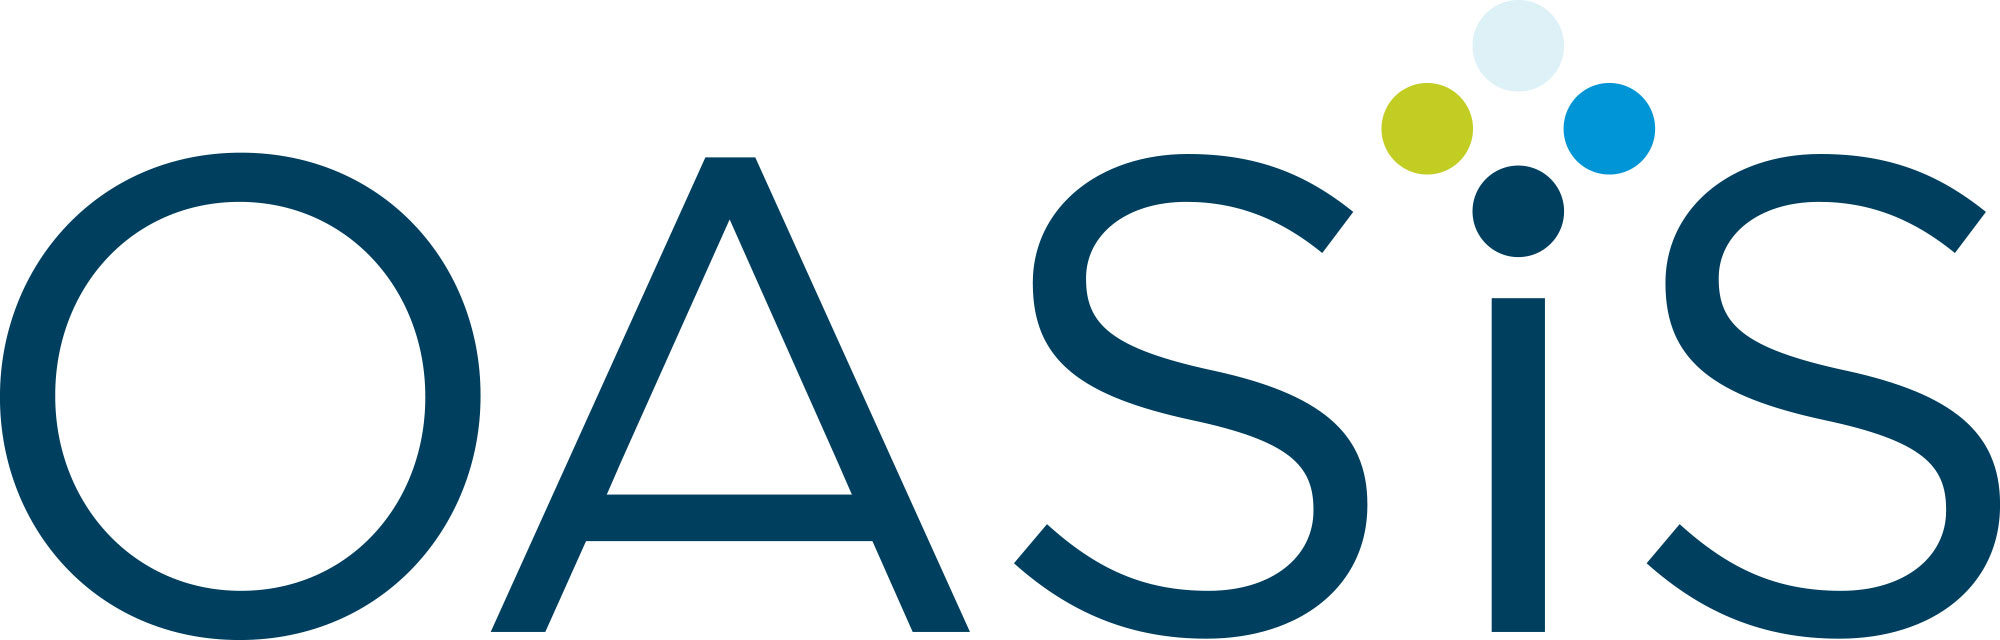


This short survey is a follow-up to the survey you, or someone else at your practice/clinic, completed in October-November 2020 to collect insight into care for patients with schizophrenia treated with atypical long-acting injectable antipsychotics (LAIs) during the COVID-19 pandemic. The focus of this follow-up survey is to better understand how clinicians at your practice/clinic have made treatment decisions for these patients during the pandemic, and your predictions of treatment decisions that will be made post-pandemic. This follow-up survey will also include questions regarding the impact of reimbursement rate for telepsychiatry visits, relative to in-person office visits, in your scheduling of patient visits during the pandemic.

Please do not limit your responses to only patients enrolled in the OASIS Study. Rather, please respond with respect to all patients with schizophrenia treated with LAIs at your practice/clinic.

No identifiable information about any individual participating in this study will be reported or made publicly available. Aggregate survey results may be published or presented to disseminate findings.

Participation is voluntary and will not affect your participation in the OASIS Study. The survey is expected to take 5-10 minutes. There will be no compensation for completing this survey.

If you cannot finish the survey in one sitting, the “Save and Continue Later” option allows you to create an individual account to finish your survey at a later time. Using this option will require you to provide your email address so that you can be sent an individualized link back to your survey. Reminders may also be sent to your email to complete the survey.

 I agree to the terms of participation in this survey

[CONTINUE BUTTON]

[Programming note: Provide “Continue” button; box must be checked before proceeding to survey content]

**Screener**

Please provide the following information:

| **Item Number** | **Question Text** | **Response Option 1** | **Response Option 2** |
| --- | --- | --- | --- |
| Screener1 | Please enter the last four digits of your 7-digit Site ID from the OASIS Study, which was provided in your email invitation to this survey. | 8 4 0 _ _ _ _  [Programming note: numeric entry] |  |
| Screener2 | I was the person at my practice/clinic who completed the initial survey for the OASIS-MAPS study in October or November 2020 | - Yes | - No |

[Programming Note: If “No” for Screener2, administer Screener3-Screener6. If “Yes” to Screener2, skip to Resp1]

Please confirm whether you agree or disagree with the following statements:

| **Item Number** | **Question Text** | **Response Option 1** | **Response Option 2** |
| --- | --- | --- | --- |
| Screener3 | I have been working at my current practice/clinic for at least a year. | - Agree | - Do not agree |
| Screener4 | I am an OASIS site principal investigator (PI), or I am a prescribing clinician at my current practice/clinic who was appointed by the OASIS PI to complete this survey. | - Agree | - Do not agree |
| Screener5 | I have knowledge about the following:   1. Standard of care prescribing practices for patients with schizophrenia at my practice/clinic 2. Standard of care prescribing practices for long-acting injectable antipsychotics (LAIs) at my practice/clinic 3. General site operations before and during the COVID-19 pandemic, including visit scheduling, day-to-day operations, changes to physical office set-up, and telepsychiatry | - Agree | - Do not agree |
| Screener6 | I acknowledge that my participation in this survey is completely voluntary and that my responses will be used for research purposes. | - Agree | - Do not agree |

[Programming Note: If “Do not agree” for any item, do not proceed to survey. Provide the following text information if the participant is not eligible: “Thank you for your interest; however, you do not meet the criteria for the current study.”]

**Survey**

[Programming note: All items are required unless otherwise noted with skip logic]

# Responder Characteristics

[Programming Note: This section is administered to all participants]

**Resp1:** How many years have you been practicing in the field of psychiatry/behavioral health?

_ _ [Programming note: 2-digit numeric entries]

**Resp2:** If you are a prescribing clinician, how many years have you been prescribing LAIs?

_ _ [Programming note: 2-digit numeric entries]

**Resp3:** How many years have you been working at your current practice/clinic?

_ _ [Programming note: 2-digit numeric entries]

**Resp4:** What is your current age (in years)?

_ _ [Programming note: 2-digit numeric entries]

| **Resp5:** What is your identified gender? | |
| --- | --- |
| Male |  |
| Female |  |
| Other |  |
| Prefer not to answer |  |

# Changes in Prescribing Patterns during the COVID-19 Pandemic

## Switching from LAIs to Oral Antipsychotics

| **Switching1:** Since the start of the COVID-19 pandemic, are you aware of at least one patient with schizophrenia at your practice/clinic who has been switched from an LAI to an oral antipsychotic? | |
| --- | --- |
| Yes |  |
| No |  |
| I don’t know |  |

[Programming note: If “Yes” then pop up Switching1a, otherwise skip to Switching4]

| **Switching1a:** Since the start of the COVID-19 pandemic, approximately what percentage of patients with schizophrenia treated with LAIs at your practice/clinic have been switched to oral antipsychotics? |
| --- |
| __% |

[Programming note: Numeric drop-down with options for <10%, 10%, 20%, 30%, 40%, 50%, 60%, 70%, 80%, 90%, 100%]

| **Switching2:** What factors have influenced your decision to switch a patient with schizophrenia at your practice/clinic from an LAI to an oral antipsychotic due to the COVID-19 pandemic?  *Select all that apply* | |
| --- | --- |
| Limited availability at your practice/clinic to administer injections due to pandemic-related reasons (e.g., staffing shortage, social distancing guidelines, government mandate) |  |
| Limited availability at places other than your practice/clinic (e.g., drive-thru sites, pharmacy clinics) to administer injections due to pandemic-related reasons |  |
| Changes in the patient’s living situation (e.g., if the patient was homeless, or needed to relocate) due to the pandemic that made it more difficult for him or her to attend in-person injection visits |  |
| Limiting the need for patients to leave home for in-person injection visits |  |
| Changes in the status of the patient’s insurance coverage (e.g., lost employer-provided insurance due to losing a job) that led to oral antipsychotic medications being more affordable (i.e., lower out-of-pocket costs) than LAIs for the patient |  |
| Changes in insurance approval processes (e.g., preauthorization requirements) that made it more difficult to prescribe LAIs than oral antipsychotic medications |  |
| Patient preference to switch due to a reason other than one listed above |  |
| Other (please specify): ___________________ [Programming note: short text box] |  |

| **Switching3:** After the COVID-19 pandemic has ended, do you think it is possible that at least one patient with schizophrenia at your practice/clinic who had been switched from an LAI to an oral antipsychotic during the pandemic would be switched back to an LAI? | |
| --- | --- |
| Yes |  |
| No |  |
| I don’t know |  |

[Programming note: If “Yes” then pop up Switching3a, otherwise skip to Switching4]

| **Switching3a:** In your prediction, after the COVID-19 pandemic has ended, approximately what percentage of patients with schizophrenia at your practice/clinic who had been switched from an LAI to an oral antipsychotic during the pandemic would be switched back to an LAI? |
| --- |
| __% |

[Programming note: Numeric drop-down with options for <10%, 10%, 20%, 30%, 40%, 50%, 60%, 70%, 80%, 90%, 100%]

## Switching to Longer Injection Interval LAIs

| **Switching4:** Since the start of the COVID-19 pandemic, are you aware of at least one patient with schizophrenia treated with an LAI at your practice/clinic who has been switched to a longer injection interval LAI (e.g., Aristada® 1064mg, Invega Trinza®) to increase time intervals between injections? | |
| --- | --- |
| Yes |  |
| No |  |
| I don’t know |  |

[Programming note: If “Yes” then pop up Switching4a, otherwise skip to Telepsychiatry1]

| **Switching4a:** Since the start of the COVID-19 pandemic, approximately what percentage of patients with schizophrenia treated with LAIs at your practice/clinic have been switched to a longer injection interval LAI? |
| --- |
| __% |

[Programming note: Numeric drop-down with options for <10%, 10%, 20%, 30%, 40%, 50%, 60%, 70%, 80%, 90%, 100%]

| **Switching5:** What factors have influenced your decision to switch a patient with schizophrenia at your practice/clinic from his or her current LAI to a longer injection interval LAI due to the COVID-19 pandemic?  *Select all that apply* | |
| --- | --- |
| Limited availability at your practice/clinic to administer injections due to pandemic-related reasons (e.g., staffing shortage, social distancing guidelines, government mandate) |  |
| Limited availability at places other than your practice/clinic (e.g., drive-thru sites, pharmacy clinics) to administer injections due to pandemic-related reasons |  |
| Changes in the patient’s living situation (e.g., if the patient was homeless, or needed to relocate) due to the pandemic that made it more difficult for him or her to attend in-person injection visits |  |
| Limiting the need for patients to leave home for in-person injection visits |  |
| Changes in the status of the patient’s insurance coverage (e.g., lost employer-provided insurance due to losing a job) that led to longer injection interval LAIs being more affordable (i.e., lower out-of-pocket costs) than shorter injection interval LAIs for the patient |  |
| Changes in insurance approval processes (e.g., preauthorization requirements) that made it more difficult to prescribe shorter injection interval LAIs than longer injection interval LAIs |  |
| Patient preference to switch due to a reason other than one listed above |  |
| Other (please specify): ___________________ [Programming note: short text box] |  |

| **Switching6:** After the COVID-19 pandemic has ended, do you think it is possible that at least one patient with schizophrenia at your practice/clinic who had been switched to a longer injection interval LAI during the pandemic would be switched back to a shorter injection interval LAI? | |
| --- | --- |
| Yes |  |
| No |  |
| I don’t know |  |

[Programming note: If “Yes” then pop up Switching6a, otherwise skip to Telepsychiatry1]

| **Switching6a:** In your prediction, after the COVID-19 pandemic has ended, approximately what percentage of patients with schizophrenia at your practice/clinic who had been switched to a longer injection interval LAI during the pandemic would be switched back to a shorter injection interval LAI? |
| --- |
| __% |

[Programming note: Numeric drop-down with options for <10%, 10%, 20%, 30%, 40%, 50%, 60%, 70%, 80%, 90%, 100%]

# Willingness to Make Treatment Decisions during Telepsychiatry Visits

| **Telepsychiatry1:** For a patient who had previously been prescribed medication at your practice/clinic prior to the COVID-19 pandemic, have you been willing to make treatment decisions regarding antipsychotic medications for patients with schizophrenia relying solely on telepsychiatry visits (e.g., starting a new treatment, switching a patient from LAI to oral antipsychotic medication or vice-versa)? | |
| --- | --- |
| Yes |  |
| No |  |
| I don’t know |  |

| **Telepsychiatry2:** For a patient who had not previously been prescribed medication at your practice/clinic prior to the COVID-19 pandemic (i.e., was a new patient at your practice/clinic), have you been willing to make treatment decisions regarding antipsychotic medications for patients with schizophrenia relying solely on telepsychiatry visits (e.g., starting a new treatment, switching a patient from LAI to oral antipsychotic medication or vice-versa)? | |
| --- | --- |
| Yes |  |
| No |  |
| I don’t know |  |

| **Telepsychiatry3:** What types of treatment decisions regarding antipsychotic medications have you been willing to make for a patient with schizophrenia based solely on telepsychiatry visits?  *Select all that apply* | |
| --- | --- |
| Switching from an LAI to an oral antipsychotic with the same molecule |  |
| Switching from an LAI to an oral antipsychotic with a different molecule |  |
| Switching from an oral antipsychotic to an LAI with the same molecule |  |
| Switching from an oral antipsychotic to an LAI with a different molecule |  |
| Switching from an oral antipsychotic to a different oral antipsychotic |  |
| Switching from an LAI to a different LAI |  |
| Prescribing a new LAI for a patient who is new to your practice/clinic |  |
| Prescribing a new oral antipsychotic for a patient who is new to your practice/clinic |  |
| Adding an additional antipsychotic medication to the patient’s current treatment regimen |  |
| For patients on multiple antipsychotic medications, removing an antipsychotic medication from their current treatment regimen |  |
| Switching from a shorter injection interval LAI to a longer injection interval LAI |  |
| Switching from a longer injection interval LAI to a shorter injection interval LAI |  |
| Other (please specify): ___________________ [Programming note: short text box] |  |

| **Telepsychiatry4:** When making a treatment decision regarding antipsychotic medications for a patient with schizophrenia based solely on telepsychiatry visits, what factors have you considered?  *Select all that apply* | |
| --- | --- |
| Whether the patient was new to your practice/clinic |  |
| How long the patient had been treated at your practice/clinic |  |
| The severity of the patient’s symptoms |  |
| Changes in the severity of the patient’s symptoms |  |
| How long the patient had been treated with his or her current antipsychotic medication |  |
| Medication side effects experienced by the patient |  |
| Medication efficacy experienced by the patient |  |
| The patient’s living situation (e.g., if the patient was homeless, or needed to relocate) |  |
| The patient was not able or not willing to attend an in-person office visit at your practice/clinic |  |
| The patient’s medical history |  |
| Changes in the status of the patient’s insurance coverage (e.g., lost employer-provided insurance due to losing a job) that led to a different antipsychotic medication being more affordable (i.e., lower out-of-pocket costs) than the patient’s current antipsychotic medication |  |
| Changes in insurance approval processes (e.g., preauthorization requirements) that made it more difficult to prescribe the patient’s current antipsychotic medication than for a different antipsychotic medication |  |
| Patient preference to switch due to a reason other than one listed above |  |
| Other (please specify): ___________________ [Programming note: short text box] |  |

# Impact of Reimbursement Rates on Use of Telepsychiatry Visits

| **Reimbursement1:** Has your practice/clinic been reimbursed at a lower rate for telepsychiatry visits than for in-person office visits for at least some patients with schizophrenia treated with LAIs? | |
| --- | --- |
| Yes |  |
| No |  |
| I don’t know |  |

[Programming note: If “No” or “I don’t know,” then end survey]

| **Reimbursement2:** Which types of medical insurance plans have reimbursed your practice/clinic at a lower rate for telepsychiatry visits than for in-person office visits for at least some patients with schizophrenia treated with LAIs?  *Select all that apply* | |
| --- | --- |
| Medicare |  |
| Medicaid |  |
| Private/commercial insurers (e.g., Employer-based insurance plans) |  |
| Other government/federal payers (e.g., Veteran’s Health Administration, Tricare, Indian Health Services) |  |
| Other (please specify): ___________________ [Programming note: short text box] |  |

| **Reimbursement3:** Have reimbursement rates for telepsychiatry visits for patients with schizophrenia treated with LAIs at your practice/clinic been dependent upon the modality used to communicate with patients?  *Select all that apply* | |
| --- | --- |
| Reimbursement rates are lower for telepsychiatry visits that use audio-only than for those that use both audio and video |  |
| Reimbursement rates are lower for telepsychiatry visits that use both audio and video than for those that use audio-only |  |
| Reimbursement rates are the same for all telepsychiatry visits, regardless of modality |  |
| I don’t know |  |

| **Reimbursement4:** Has the lower reimbursement rate for a telepsychiatry visit compared to an in-person visit led to clinicians at your practice/clinic being less willing or able to schedule telepsychiatry visits for at least some of the patients with schizophrenia treated with LAIs? | |
| --- | --- |
| Yes |  |
| No |  |
| I don’t know |  |
